# Supplementary material for: Genetic diversity and population structure of muscovy duck ( Cairina moschata ) from Nigeria
Source: PeerJ journal article supplement (doi:10.7717/peerj.13236), 2022-04-15

**Figure S3.** Mismatch distribution (Rogers & Harpending 1992) patterns for (a) Nigerian Muscovy duck mismatch distribution – CYTB (b) Nigerian Muscovy duck Population expansion mismatch distribution – CYTB (c) Nigerian Muscovy duck Mismatch distribution - CYP2U1 (d) Nigerian Muscovy duck Population expansion mismatch distribution - CYP2U1. With 1000 bootstrap replication and pairwise difference, using ARLEQUIN v3.5 (Excoffier & Lischer, 2010).

(a)

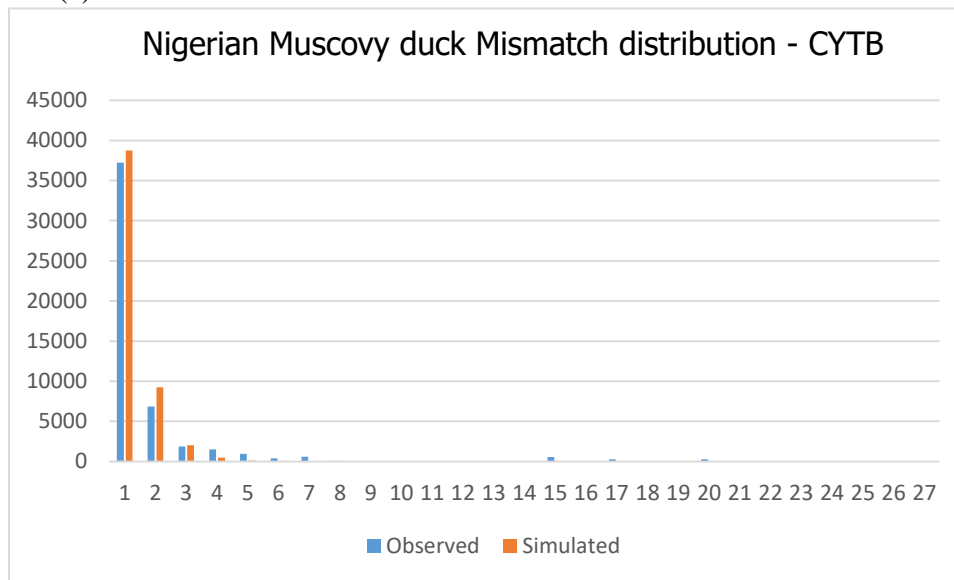

(b)

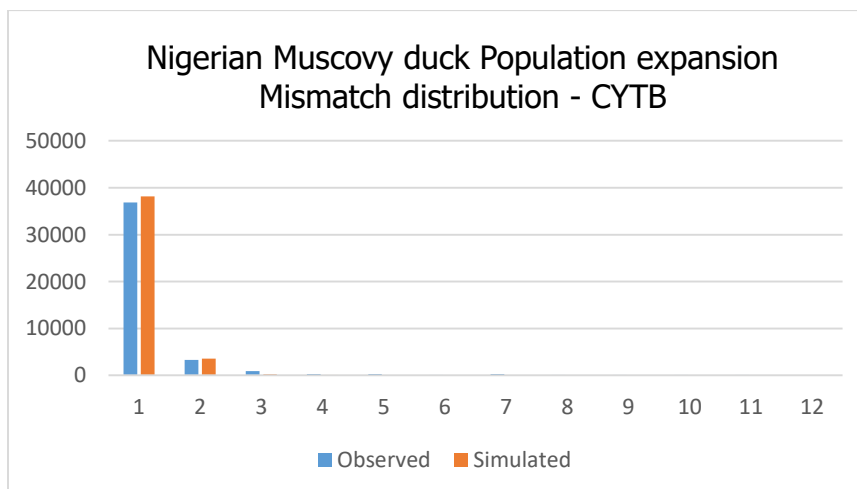

(c)

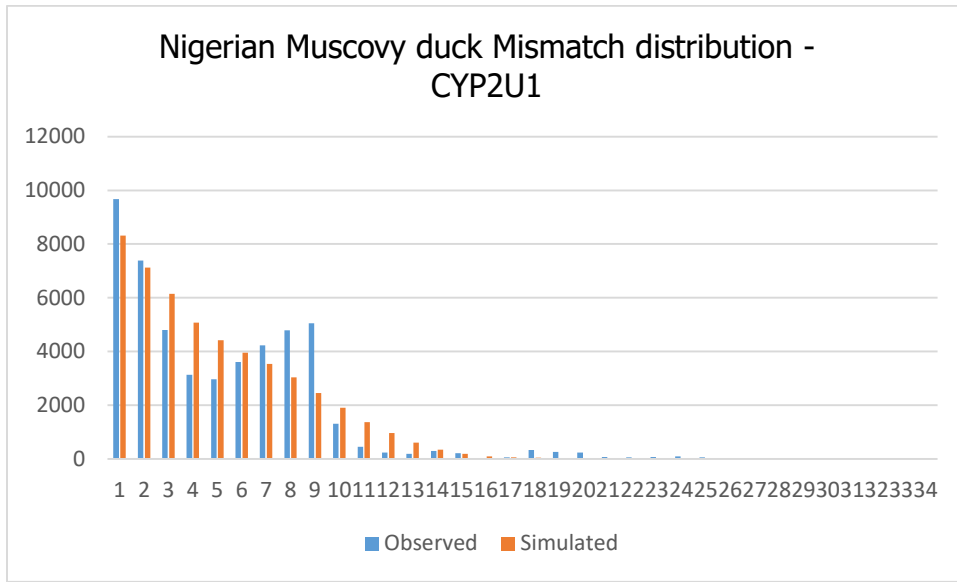

(d)

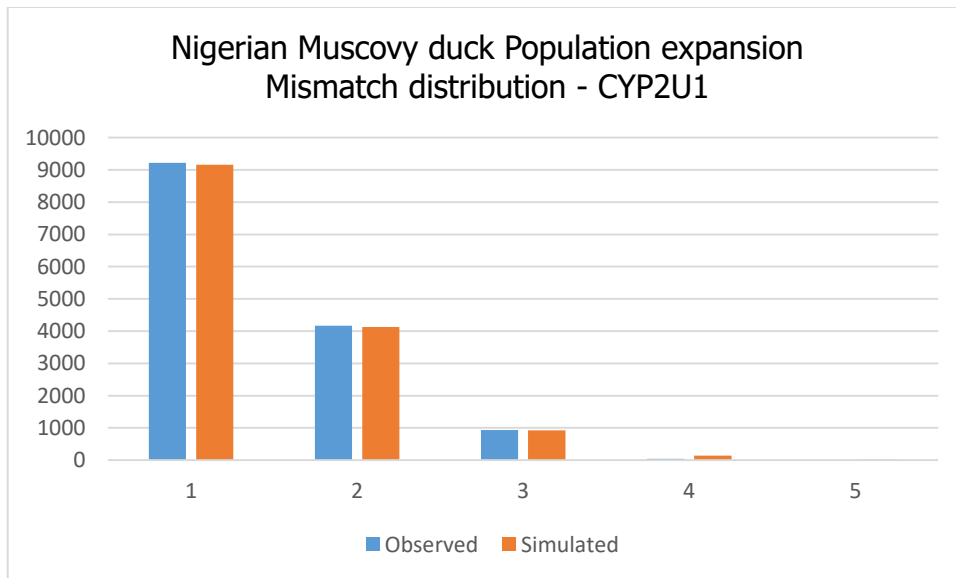

Supplement: Figure_S3.pdf [file Figure_S3.pdf]
