# Supplementary material for: Genetic diversity and population structure of muscovy duck (Cairina moschata) from Nigeria
Source: PeerJ. 2022 Apr 15;10:e13236. doi: 10.7717/peerj.13236 (PMC9014852; doi:10.7717/peerj.13236)
Supplement: Supplemental Information 4 [file peerj-10-13236-s004.xlsx]

## Sheet: Table S1-461 Duck Information
Table S1: Information of 468 Muscovy duck samples from Nigeria, India, United States and China
s/n	Work Id	Accession no (CYP2U1)	Accession no (Cytochrome b)	Sex	Location	State	Country	References
1	OYA1	MZ383202	MZ383590	Male	Oyo-A	Oyo	Nigeria	Current study
2	OYA2	MZ383213	MZ383600	Male	Oyo-A	Oyo	Nigeria	Current study
3	OYA3	MZ383223	MZ383610	Female	Oyo-A	Oyo	Nigeria	Current study
4	OYA4	MZ383234	MZ383619	Male	Oyo-A	Oyo	Nigeria	Current study
5	OYA5	N/A	MZ383620	Male	Oyo-A	Oyo	Nigeria	Current study
6	OYA6	MZ383235	MZ383621	Female	Oyo-A	Oyo	Nigeria	Current study
7	OYA7	MZ383236	MZ383622	Female	Oyo-A	Oyo	Nigeria	Current study
8	OYA8	MZ383237	N/A	Female	Oyo-A	Oyo	Nigeria	Current study
9	OYA9	MZ383238	MZ383623	Female	Oyo-A	Oyo	Nigeria	Current study
10	OYA10	MZ383203	MZ383591	Male	Oyo-A	Oyo	Nigeria	Current study
11	OYA11	MZ383204	MZ383592	Male	Oyo-A	Oyo	Nigeria	Current study
12	OYA12	MZ383205	MZ383593	Male	Oyo-A	Oyo	Nigeria	Current study
13	OYA13	MZ383206	MZ383594	Male	Oyo-A	Oyo	Nigeria	Current study
14	OYA14	MZ383207	MZ383595	Female	Oyo-A	Oyo	Nigeria	Current study
15	OYA15	MZ383208	MZ383596	Male	Oyo-A	Oyo	Nigeria	Current study
16	OYA16	MZ383209	MZ383597	Male	Oyo-A	Oyo	Nigeria	Current study
17	OYA17	MZ383210	MZ383598	Female	Oyo-A	Oyo	Nigeria	Current study
18	OYA18	MZ383211	MZ383599	Female	Oyo-A	Oyo	Nigeria	Current study
19	OYA19	MZ383212	N/A	Female	Oyo-A	Oyo	Nigeria	Current study
20	OYA20	MZ383214	MZ383601	Female	Oyo-A	Oyo	Nigeria	Current study
21	OYA21	N/A	MZ383602	Female	Oyo-A	Oyo	Nigeria	Current study
22	OYA22	MZ383215	MZ383603	Female	Oyo-A	Oyo	Nigeria	Current study
23	OYA23	MZ383216	MZ383604	Male	Oyo-A	Oyo	Nigeria	Current study
24	OYA24	MZ383217	MZ383605	Female	Oyo-A	Oyo	Nigeria	Current study
25	OYA25	MZ383218	MZ383606	Male	Oyo-A	Oyo	Nigeria	Current study
26	OYA26	MZ383219	MZ383607	Male	Oyo-A	Oyo	Nigeria	Current study
27	OYA27	MZ383220	MZ383608	Male	Oyo-A	Oyo	Nigeria	Current study
28	OYA28	MZ383221	MZ383609	Male	Oyo-A	Oyo	Nigeria	Current study
29	OYA29	MZ383222	N/A	Male	Oyo-A	Oyo	Nigeria	Current study
30	OYA30	MZ383224	MZ383611	Male	Oyo-A	Oyo	Nigeria	Current study
31	OYA31	MZ383225	MZ383612	Male	Oyo-A	Oyo	Nigeria	Current study
32	OYA32	MZ383226	MZ383613	Female	Oyo-A	Oyo	Nigeria	Current study
33	OYA33	MZ383227	MZ383614	Male	Oyo-A	Oyo	Nigeria	Current study
34	OYA34	MZ383228	MZ383615	Male	Oyo-A	Oyo	Nigeria	Current study
35	OYA35	MZ383229	MZ383616	Female	Oyo-A	Oyo	Nigeria	Current study
36	OYA36	MZ383230	MZ383617	Male	Oyo-A	Oyo	Nigeria	Current study
37	OYA37	MZ383231	MZ383618	Male	Oyo-A	Oyo	Nigeria	Current study
38	OYB38	MZ383232	MZ383624	Male	Oyo-B	Oyo	Nigeria	Current study
39	OYB39	MZ383233	MZ383625	Male	Oyo-B	Oyo	Nigeria	Current study
40	OYB40	MZ383239	MZ383626	Male	Oyo-B	Oyo	Nigeria	Current study
41	OYB41	MZ383240	N/A	Male	Oyo-B	Oyo	Nigeria	Current study
42	OYB42	MZ383241	MZ383627	Male	Oyo-B	Oyo	Nigeria	Current study
43	OYB43	MZ383242	MZ383628	Male	Oyo-B	Oyo	Nigeria	Current study
44	OYB44	MZ383243	MZ383629	Female	Oyo-B	Oyo	Nigeria	Current study
45	OYB45	MZ383244	N/A	Male	Oyo-B	Oyo	Nigeria	Current study
46	OYB46	MZ383245	MZ383630	Female	Oyo-B	Oyo	Nigeria	Current study
47	OYB47	MZ383246	N/A	Female	Oyo-B	Oyo	Nigeria	Current study
48	OYB48	MZ383247	MZ383631	Male	Oyo-B	Oyo	Nigeria	Current study
49	OYB49	MZ383248	MZ383632	Male	Oyo-B	Oyo	Nigeria	Current study
50	OYB50	MZ383249	MZ383633	Male	Oyo-B	Oyo	Nigeria	Current study
51	OYB51	MZ383250	MZ383634	Male	Oyo-B	Oyo	Nigeria	Current study
52	OYB52	MZ383251	MZ383635	Male	Oyo-B	Oyo	Nigeria	Current study
53	OYB53	MZ383252	MZ383636	Male	Oyo-B	Oyo	Nigeria	Current study
54	OYB54	MZ383253	MZ383637	Male	Oyo-B	Oyo	Nigeria	Current study
55	OYB55	MZ383254	MZ383638	Male	Oyo-B	Oyo	Nigeria	Current study
56	OYB56	MZ383255	MZ383639	Female	Oyo-B	Oyo	Nigeria	Current study
57	OYB57	MZ383256	MZ383640	Female	Oyo-B	Oyo	Nigeria	Current study
58	OYB58	MZ383257	MZ383641	Female	Oyo-B	Oyo	Nigeria	Current study
59	OYB59	MZ383258	MZ383642	Male	Oyo-B	Oyo	Nigeria	Current study
60	OYB60	MZ383259	N/A	Female	Oyo-B	Oyo	Nigeria	Current study
61	OYB61	MZ383260	MZ383643	Female	Oyo-B	Oyo	Nigeria	Current study
62	OYB62	MZ383261	MZ383644	Female	Oyo-B	Oyo	Nigeria	Current study
63	OYB63	MZ383262	MZ383645	Female	Oyo-B	Oyo	Nigeria	Current study
64	OYB64	MZ383263	MZ383646	Male	Oyo-B	Oyo	Nigeria	Current study
65	OYB65	MZ383264	MZ383647	Female	Oyo-B	Oyo	Nigeria	Current study
66	OYB66	MZ383265	MZ383648	Male	Oyo-B	Oyo	Nigeria	Current study
67	OYB67	MZ383266	MZ383649	Male	Oyo-B	Oyo	Nigeria	Current study
68	OYB68	MZ383267	MZ383650	Male	Oyo-B	Oyo	Nigeria	Current study
69	OYB69	MZ383268	MZ383651	Male	Oyo-B	Oyo	Nigeria	Current study
70	OYB70	MZ383269	MZ383652	Male	Oyo-B	Oyo	Nigeria	Current study
71	OYB71	MZ383270	MZ383653	Female	Oyo-B	Oyo	Nigeria	Current study
72	OYB72	MZ383271	MZ383654	Female	Oyo-B	Oyo	Nigeria	Current study
73	OYB73	MZ383272	MZ383655	Female	Oyo-B	Oyo	Nigeria	Current study
74	BAA74	MZ383283	MZ383536	Male	Bayelsa-A	Bayelsa	Nigeria	Current study
75	BAA75	MZ383284	MZ383537	Male	Bayelsa-A	Bayelsa	Nigeria	Current study
76	BAA76	MZ383285	MZ383538	Male	Bayelsa-A	Bayelsa	Nigeria	Current study
77	BAA77	MZ383286	MZ383539	Male	Bayelsa-A	Bayelsa	Nigeria	Current study
78	BAA78	MZ383287	MZ383540	Male	Bayelsa-A	Bayelsa	Nigeria	Current study
79	BAA79	MZ383288	MZ383541	Male	Bayelsa-A	Bayelsa	Nigeria	Current study
80	BAA80	MZ383289	MZ383542	Male	Bayelsa-A	Bayelsa	Nigeria	Current study
81	BAA81	MZ383290	MZ383543	Male	Bayelsa-A	Bayelsa	Nigeria	Current study
82	BAA82	MZ383291	MZ383544	Male	Bayelsa-A	Bayelsa	Nigeria	Current study
83	BAA83	MZ383292	MZ383545	Male	Bayelsa-A	Bayelsa	Nigeria	Current study
84	BAA84	MZ383293	MZ383546	Female	Bayelsa-A	Bayelsa	Nigeria	Current study
85	BAA85	MZ383294	MZ383547	Female	Bayelsa-A	Bayelsa	Nigeria	Current study
86	BAA86	MZ383295	MZ383548	Male	Bayelsa-A	Bayelsa	Nigeria	Current study
87	BAA87	MZ383296	MZ383549	Male	Bayelsa-A	Bayelsa	Nigeria	Current study
88	BAA88	MZ383297	N/A	Male	Bayelsa-A	Bayelsa	Nigeria	Current study
89	BAA89	MZ383298	MZ383550	Male	Bayelsa-A	Bayelsa	Nigeria	Current study
90	BAA90	MZ383299	MZ383551	Female	Bayelsa-A	Bayelsa	Nigeria	Current study
91	BAA91	MZ383300	MZ383552	Female	Bayelsa-A	Bayelsa	Nigeria	Current study
92	BAA92	MZ383301	MZ383553	Female	Bayelsa-A	Bayelsa	Nigeria	Current study
93	BAA93	MZ383302	MZ383554	Female	Bayelsa-A	Bayelsa	Nigeria	Current study
94	BAA94	MZ383303	MZ383555	Female	Bayelsa-A	Bayelsa	Nigeria	Current study
95	BAA95	MZ383304	MZ383556	Female	Bayelsa-A	Bayelsa	Nigeria	Current study
96	BAA96	MZ383305	MZ383557	Female	Bayelsa-A	Bayelsa	Nigeria	Current study
97	BAA97	MZ383306	MZ383558	Female	Bayelsa-A	Bayelsa	Nigeria	Current study
98	BAA98	MZ383307	MZ383559	Female	Bayelsa-A	Bayelsa	Nigeria	Current study
99	BAA99	MZ383308	N/A	Female	Bayelsa-A	Bayelsa	Nigeria	Current study
100	BAA100	MZ383273	MZ383528	Male	Bayelsa-A	Bayelsa	Nigeria	Current study
101	BAA101	MZ383274	MZ383529	Female	Bayelsa-A	Bayelsa	Nigeria	Current study
102	BAA102	MZ383275	MZ383530	Male	Bayelsa-A	Bayelsa	Nigeria	Current study
103	BAA103	MZ383276	MZ383531	Female	Bayelsa-A	Bayelsa	Nigeria	Current study
104	BAA104	MZ383277	MZ383532	Female	Bayelsa-A	Bayelsa	Nigeria	Current study
105	BAA105	MZ383278	MZ383533	Female	Bayelsa-A	Bayelsa	Nigeria	Current study
106	BAA106	MZ383279	MZ383534	Female	Bayelsa-A	Bayelsa	Nigeria	Current study
107	BAA107	MZ383280	MZ383535	Female	Bayelsa-A	Bayelsa	Nigeria	Current study
108	BAB108	MZ383281	MZ383560	Male	Bayelsa-B	Bayelsa	Nigeria	Current study
109	BAB109	MZ383282	MZ383561	Female	Bayelsa-B	Bayelsa	Nigeria	Current study
110	BAB110	MZ383309	MZ383562	Male	Bayelsa-B	Bayelsa	Nigeria	Current study
111	BAB111	MZ383310	MZ383563	Female	Bayelsa-B	Bayelsa	Nigeria	Current study
112	BAB112	MZ383311	MZ383564	Male	Bayelsa-B	Bayelsa	Nigeria	Current study
113	BAB113	MZ383312	MZ383565	Female	Bayelsa-B	Bayelsa	Nigeria	Current study
114	BAB114	MZ383313	MZ383566	Male	Bayelsa-B	Bayelsa	Nigeria	Current study
115	BAB115	MZ383314	MZ383567	Male	Bayelsa-B	Bayelsa	Nigeria	Current study
116	BAB116	MZ383315	MZ383568	Male	Bayelsa-B	Bayelsa	Nigeria	Current study
117	BAB117	MZ383316	MZ383569	Male	Bayelsa-B	Bayelsa	Nigeria	Current study
118	BAB118	MZ383317	MZ383570	Male	Bayelsa-B	Bayelsa	Nigeria	Current study
119	BAB119	MZ383318	MZ383571	Male	Bayelsa-B	Bayelsa	Nigeria	Current study
120	BAB120	MZ383319	MZ383572	Female	Bayelsa-B	Bayelsa	Nigeria	Current study
121	BAB121	MZ383320	N/A	Female	Bayelsa-B	Bayelsa	Nigeria	Current study
122	BAB122	MZ383321	MZ383573	Female	Bayelsa-B	Bayelsa	Nigeria	Current study
123	BAB123	MZ383322	MZ383574	Male	Bayelsa-B	Bayelsa	Nigeria	Current study
124	BAB124	MZ383323	MZ383575	Male	Bayelsa-B	Bayelsa	Nigeria	Current study
125	BAB125	MZ383324	MZ383576	Male	Bayelsa-B	Bayelsa	Nigeria	Current study
126	BAB126	MZ383325	MZ383577	Male	Bayelsa-B	Bayelsa	Nigeria	Current study
127	BAB127	MZ383326	N/A	Male	Bayelsa-B	Bayelsa	Nigeria	Current study
128	BAB128	MZ383327	MZ383578	Male	Bayelsa-B	Bayelsa	Nigeria	Current study
129	BAB129	MZ383328	MZ383579	Male	Bayelsa-B	Bayelsa	Nigeria	Current study
130	BAB130	MZ383329	MZ383580	Female	Bayelsa-B	Bayelsa	Nigeria	Current study
131	BAB131	MZ383330	MZ383581	Male	Bayelsa-B	Bayelsa	Nigeria	Current study
132	BAB132	MZ383331	MZ383582	Female	Bayelsa-B	Bayelsa	Nigeria	Current study
133	BAB133	MZ383332	MZ383583	Male	Bayelsa-B	Bayelsa	Nigeria	Current study
134	BAB134	MZ383333	MZ383584	Female	Bayelsa-B	Bayelsa	Nigeria	Current study
135	BAB135	MZ383334	MZ383585	Male	Bayelsa-B	Bayelsa	Nigeria	Current study
136	BAB136	MZ383335	MZ383586	Male	Bayelsa-B	Bayelsa	Nigeria	Current study
137	BAB137	MZ383336	MZ383587	Male	Bayelsa-B	Bayelsa	Nigeria	Current study
138	BAB138	MZ383337	N/A	Male	Bayelsa-B	Bayelsa	Nigeria	Current study
139	BAB139	MZ383338	MZ383588	Female	Bayelsa-B	Bayelsa	Nigeria	Current study
140	BAB140	MZ383339	MZ383589	Female	Bayelsa-B	Bayelsa	Nigeria	Current study
141	KAA141	MZ383340	MZ383656	Male	Kano-A	Kano	Nigeria	Current study
142	KAA142	MZ383341	MZ383657	Male	Kano-A	Kano	Nigeria	Current study
143	KAA143	MZ383342	MZ383658	Male	Kano-A	Kano	Nigeria	Current study
144	KAA144	MZ383343	MZ383659	Male	Kano-A	Kano	Nigeria	Current study
145	KAA145	MZ383344	MZ383660	Male	Kano-A	Kano	Nigeria	Current study
146	KAA146	MZ383345	MZ383661	Female	Kano-A	Kano	Nigeria	Current study
147	KAA147	MZ383346	MZ383662	Female	Kano-A	Kano	Nigeria	Current study
148	KAA148	MZ383347	N/A	Male	Kano-A	Kano	Nigeria	Current study
149	KAA149	MZ383348	MZ383663	Female	Kano-A	Kano	Nigeria	Current study
150	KAA150	MZ383349	MZ383664	Female	Kano-A	Kano	Nigeria	Current study
151	KAA151	MZ383350	MZ383665	Female	Kano-A	Kano	Nigeria	Current study
152	KAA152	MZ383351	MZ383666	Female	Kano-A	Kano	Nigeria	Current study
153	KAA153	MZ383352	MZ383667	Female	Kano-A	Kano	Nigeria	Current study
154	KAA154	MZ383353	MZ383668	Female	Kano-A	Kano	Nigeria	Current study
155	KAA155	MZ383354	MZ383669	Female	Kano-A	Kano	Nigeria	Current study
156	KAA156	MZ383355	MZ383670	Female	Kano-A	Kano	Nigeria	Current study
157	KAA157	N/A	MZ383671	Female	Kano-A	Kano	Nigeria	Current study
158	KAA158	MZ383356	MZ383672	Female	Kano-A	Kano	Nigeria	Current study
159	KAA159	MZ383357	MZ383673	Female	Kano-A	Kano	Nigeria	Current study
160	KAA160	MZ383358	MZ383674	Male	Kano-A	Kano	Nigeria	Current study
161	KAA161	N/A	MZ383675	Female	Kano-A	Kano	Nigeria	Current study
162	KAA162	MZ383359	MZ383676	Male	Kano-A	Kano	Nigeria	Current study
163	KAA163	MZ383360	MZ383677	Male	Kano-A	Kano	Nigeria	Current study
164	KAA164	N/A	MZ383678	Male	Kano-A	Kano	Nigeria	Current study
165	KAA165	MZ383361	MZ383679	Male	Kano-A	Kano	Nigeria	Current study
166	KAA166	MZ383362	MZ383680	Male	Kano-A	Kano	Nigeria	Current study
167	KAA167	MZ383363	MZ383681	Male	Kano-A	Kano	Nigeria	Current study
168	KAA168	MZ383364	MZ383682	Male	Kano-A	Kano	Nigeria	Current study
169	KAA169	MZ383365	MZ383683	Male	Kano-A	Kano	Nigeria	Current study
170	KAA170	MZ383366	MZ383684	Male	Kano-A	Kano	Nigeria	Current study
171	KAA171	MZ383367	MZ383685	Female	Kano-A	Kano	Nigeria	Current study
172	KAB172	MZ383368	MZ383686	Female	Kano-B	Kano	Nigeria	Current study
173	KAB173	MZ383369	MZ383687	Male	Kano-B	Kano	Nigeria	Current study
174	KAB174	MZ383370	MZ383688	Male	Kano-B	Kano	Nigeria	Current study
175	KAB175	MZ383371	MZ383689	Female	Kano-B	Kano	Nigeria	Current study
176	KAB176	MZ383372	MZ383690	Male	Kano-B	Kano	Nigeria	Current study
177	KAB177	MZ383373	MZ383691	Male	Kano-B	Kano	Nigeria	Current study
178	KAB178	MZ383374	N/A	Male	Kano-B	Kano	Nigeria	Current study
179	KAB179	MZ383375	N/A	Male	Kano-B	Kano	Nigeria	Current study
180	KAB180	MZ383376	MZ383692	Male	Kano-B	Kano	Nigeria	Current study
181	KAB181	MZ383377	MZ383693	Male	Kano-B	Kano	Nigeria	Current study
182	KAB182	N/A	N/A	Male	Kano-B	Kano	Nigeria	Current study
183	KAB183	MZ383378	N/A	Male	Kano-B	Kano	Nigeria	Current study
184	KAB184	MZ383379	MZ383694	Male	Kano-B	Kano	Nigeria	Current study
185	KAB185	MZ383380	MZ383695	Male	Kano-B	Kano	Nigeria	Current study
186	KAB186	MZ383381	MZ383696	Female	Kano-B	Kano	Nigeria	Current study
187	KAB187	N/A	MZ383697	Female	Kano-B	Kano	Nigeria	Current study
188	KAB188	N/A	MZ383698	Male	Kano-B	Kano	Nigeria	Current study
189	KAB189	N/A	MZ383699	Female	Kano-B	Kano	Nigeria	Current study
190	KAB190	N/A	MZ383700	Male	Kano-B	Kano	Nigeria	Current study
191	KAB191	N/A	MZ383701	Female	Kano-B	Kano	Nigeria	Current study
192	KAB192	N/A	MZ383702	Female	Kano-B	Kano	Nigeria	Current study
193	KAB193	MZ383382	MZ383703	Female	Kano-B	Kano	Nigeria	Current study
194	KAB194	MZ383383	MZ383704	Female	Kano-B	Kano	Nigeria	Current study
195	KAB195	MZ383384	MZ383705	Male	Kano-B	Kano	Nigeria	Current study
196	KAB196	MZ383385	MZ383706	Female	Kano-B	Kano	Nigeria	Current study
197	KAB197	MZ383386	MZ383707	Male	Kano-B	Kano	Nigeria	Current study
198	KAB198	MZ383387	MZ383708	Male	Kano-B	Kano	Nigeria	Current study
199	KAB199	MZ383388	MZ383709	Male	Kano-B	Kano	Nigeria	Current study
200	KAB200	MZ383389	MZ383710	Male	Kano-B	Kano	Nigeria	Current study
201	KAB201	MZ383390	MZ383711	Male	Kano-B	Kano	Nigeria	Current study
202	KAB202	MZ383391	MZ383712	Female	Kano-B	Kano	Nigeria	Current study
203	EKA203	MZ383392	MZ383713	Male	Ekiti-A	Ekiti	Nigeria	Current study
204	EKA204	MZ383393	MZ383714	Male	Ekiti-A	Ekiti	Nigeria	Current study
205	EKA205	MZ383394	MZ383715	Male	Ekiti-A	Ekiti	Nigeria	Current study
206	EKA206	MZ383395	MZ383716	Female	Ekiti-A	Ekiti	Nigeria	Current study
207	EKA207	MZ383396	MZ383717	Male	Ekiti-A	Ekiti	Nigeria	Current study
208	EKA208	MZ383397	MZ383718	Female	Ekiti-A	Ekiti	Nigeria	Current study
209	EKA209	MZ383398	MZ383719	Male	Ekiti-A	Ekiti	Nigeria	Current study
210	EKA210	MZ383399	MZ383720	Female	Ekiti-A	Ekiti	Nigeria	Current study
211	EKA211	MZ383400	N/A	Female	Ekiti-A	Ekiti	Nigeria	Current study
212	EKA212	MZ383401	MZ383721	Female	Ekiti-A	Ekiti	Nigeria	Current study
213	EKA213	MZ383402	MZ383722	Female	Ekiti-A	Ekiti	Nigeria	Current study
214	EKA214	MZ383403	MZ383723	Female	Ekiti-A	Ekiti	Nigeria	Current study
215	EKA215	N/A	MZ383724	Female	Ekiti-A	Ekiti	Nigeria	Current study
216	EKA216	MZ383404	MZ383725	Male	Ekiti-A	Ekiti	Nigeria	Current study
217	EKA217	MZ383405	MZ383726	Female	Ekiti-A	Ekiti	Nigeria	Current study
218	EKA218	MZ383406	MZ383727	Female	Ekiti-A	Ekiti	Nigeria	Current study
219	EKA219	MZ383407	MZ383728	Male	Ekiti-A	Ekiti	Nigeria	Current study
220	EKA220	MZ383408	MZ383729	Male	Ekiti-A	Ekiti	Nigeria	Current study
221	EKA221	MZ383409	MZ383730	Male	Ekiti-A	Ekiti	Nigeria	Current study
222	EKA222	N/A	N/A	Male	Ekiti-A	Ekiti	Nigeria	Current study
223	EKA223	MZ383410	MZ383731	Male	Ekiti-A	Ekiti	Nigeria	Current study
224	EKA224	MZ383411	MZ383732	Male	Ekiti-A	Ekiti	Nigeria	Current study
225	EKA225	N/A	MZ383733	Female	Ekiti-A	Ekiti	Nigeria	Current study
226	EKA226	MZ383412	MZ383734	Male	Ekiti-A	Ekiti	Nigeria	Current study
227	EKA227	MZ383413	MZ383735	Female	Ekiti-A	Ekiti	Nigeria	Current study
228	EKA228	N/A	MZ383736	Female	Ekiti-A	Ekiti	Nigeria	Current study
229	EKA229	MZ383414	MZ383737	Female	Ekiti-A	Ekiti	Nigeria	Current study
230	EKA230	MZ383415	MZ383738	Female	Ekiti-A	Ekiti	Nigeria	Current study
231	EKA231	MZ383416	MZ383739	Female	Ekiti-A	Ekiti	Nigeria	Current study
232	EKA232	N/A	N/A	Male	Ekiti-A	Ekiti	Nigeria	Current study
233	EKB233	MZ383417	MZ383740	Female	Ekiti-B	Ekiti	Nigeria	Current study
234	EKB234	N/A	N/A	Male	Ekiti-B	Ekiti	Nigeria	Current study
235	EKB235	MZ383418	MZ383741	Female	Ekiti-B	Ekiti	Nigeria	Current study
236	EKB236	N/A	N/A	Female	Ekiti-B	Ekiti	Nigeria	Current study
237	EKB237	N/A	MZ383742	Female	Ekiti-B	Ekiti	Nigeria	Current study
238	EKB238	MZ383419	MZ383743	Female	Ekiti-B	Ekiti	Nigeria	Current study
239	EKB239	MZ383420	MZ383744	Female	Ekiti-B	Ekiti	Nigeria	Current study
240	EKB240	N/A	MZ383745	Male	Ekiti-B	Ekiti	Nigeria	Current study
241	EKB241	MZ383421	MZ383746	Male	Ekiti-B	Ekiti	Nigeria	Current study
242	EKB242	MZ383422	MZ383747	Male	Ekiti-B	Ekiti	Nigeria	Current study
243	EKB243	MZ383423	MZ383748	Female	Ekiti-B	Ekiti	Nigeria	Current study
244	EKB244	MZ383424	MZ383749	Female	Ekiti-B	Ekiti	Nigeria	Current study
245	EKB245	N/A	MZ383750	Male	Ekiti-B	Ekiti	Nigeria	Current study
246	EKB246	N/A	MZ383751	Female	Ekiti-B	Ekiti	Nigeria	Current study
247	EKB247	MZ383425	MZ383752	Male	Ekiti-B	Ekiti	Nigeria	Current study
248	EKB248	MZ383426	MZ383753	Female	Ekiti-B	Ekiti	Nigeria	Current study
249	EKB249	N/A	MZ383754	Female	Ekiti-B	Ekiti	Nigeria	Current study
250	EKB250	MZ383427	MZ383755	Female	Ekiti-B	Ekiti	Nigeria	Current study
251	EKB251	MZ383428	MZ383756	Female	Ekiti-B	Ekiti	Nigeria	Current study
252	EKB252	MZ383429	MZ383757	Male	Ekiti-B	Ekiti	Nigeria	Current study
253	EKB253	MZ383430	MZ383758	Male	Ekiti-B	Ekiti	Nigeria	Current study
254	EKB254	MZ383431	MZ383759	Female	Ekiti-B	Ekiti	Nigeria	Current study
255	EKB255	N/A	N/A	Female	Ekiti-B	Ekiti	Nigeria	Current study
256	EKB256	MZ383432	MZ383760	Female	Ekiti-B	Ekiti	Nigeria	Current study
257	EKB257	N/A	MZ383761	Male	Ekiti-B	Ekiti	Nigeria	Current study
258	EKB258	MZ383433	MZ383762	Female	Ekiti-B	Ekiti	Nigeria	Current study
259	EKB259	N/A	N/A	Male	Ekiti-B	Ekiti	Nigeria	Current study
260	EKB260	MZ383434	MZ383763	Male	Ekiti-B	Ekiti	Nigeria	Current study
261	EKB261	N/A	MZ383764	Male	Ekiti-B	Ekiti	Nigeria	Current study
262	EKB262	N/A	MZ383765	Female	Ekiti-B	Ekiti	Nigeria	Current study
263	SOK263	N/A	N/A	Male	Sokoto	Sokoto	Nigeria	Current study
264	SOK264	N/A	MZ383766	Male	Sokoto	Sokoto	Nigeria	Current study
265	SOK265	MZ383435	MZ383767	Female	Sokoto	Sokoto	Nigeria	Current study
266	SOK279	N/A	MZ383780	Female	Sokoto	Sokoto	Nigeria	Current study
267	SOK266	MZ383436	MZ383768	Female	Sokoto	Sokoto	Nigeria	Current study
268	SOK267	N/A	MZ383769	Male	Sokoto	Sokoto	Nigeria	Current study
269	SOK268	MZ383437	MZ383770	Female	Sokoto	Sokoto	Nigeria	Current study
270	SOK269	MZ383438	MZ383771	Female	Sokoto	Sokoto	Nigeria	Current study
271	SOK270	N/A	MZ383772	Female	Sokoto	Sokoto	Nigeria	Current study
272	SOK271	MZ383439	MZ383773	Female	Sokoto	Sokoto	Nigeria	Current study
273	SOK272	MZ383440	MZ383774	Male	Sokoto	Sokoto	Nigeria	Current study
274	SOK273	MZ383441	MZ383775	Male	Sokoto	Sokoto	Nigeria	Current study
275	SOK274	N/A	MZ383776	Female	Sokoto	Sokoto	Nigeria	Current study
276	SOK275	N/A	MZ383777	Female	Sokoto	Sokoto	Nigeria	Current study
277	SOK276	N/A	MZ383778	Male	Sokoto	Sokoto	Nigeria	Current study
278	SOK277	MZ383442	MZ383779	Male	Sokoto	Sokoto	Nigeria	Current study
279	WUK278	MZ383445	N/A	Female	Taraba	Taraba	Nigeria	Current study
280	WUK279	N/A	N/A	Female	Taraba	Taraba	Nigeria	Current study
281	SERT280	N/A	N/A	Female	Taraba	Taraba	Nigeria	Current study
282	SERT281	N/A	MZ383781	Male	Taraba	Taraba	Nigeria	Current study
283	SERT282	MZ383443	N/A	Female	Taraba	Taraba	Nigeria	Current study
284	SERT283	N/A	MZ383782	Female	Taraba	Taraba	Nigeria	Current study
285	SERT284	MZ383444	MZ383783	Male	Taraba	Taraba	Nigeria	Current study
286	SERT285	N/A	MZ383784	Male	Taraba	Taraba	Nigeria	Current study
287	SERT286	N/A	MZ383785	Male	Taraba	Taraba	Nigeria	Current study
288	ILE1	MZ383470	MZ330029	n/a	Ilesha	Kwara	Nigeria	Sola-Ojo et al., 2021
289	IDO2	N/A	MZ330026	n/a	Idofian	Kwara	Nigeria	Sola-Ojo et al., 2021
290	BON3	MZ383462	N/A	n/a	Bani	Kwara	Nigeria	Sola-Ojo et al., 2021
291	ADE4	MZ383448	N/A	n/a	Aderan	Kwara	Nigeria	Sola-Ojo et al., 2021
292	ILE6	MZ383471	N/A	n/a	Ilesha	Kwara	Nigeria	Sola-Ojo et al., 2021
293	BON7	MZ383463	MZ330022	n/a	Bani	Kwara	Nigeria	Sola-Ojo et al., 2021
294	OKE8	MZ383502	MZ330055	n/a	Okuta	Kwara	Nigeria	Sola-Ojo et al., 2021
295	BON9	MZ383464	N/A	n/a	Bani	Kwara	Nigeria	Sola-Ojo et al., 2021
296	BON10	MZ383465	MZ330023	n/a	Bani	Kwara	Nigeria	Sola-Ojo et al., 2021
297	ADE11	MZ383449	MZ330002	n/a	Aderan	Kwara	Nigeria	Sola-Ojo et al., 2021
298	ILE12	MZ383472	MZ330030	n/a	Ilesha	Kwara	Nigeria	Sola-Ojo et al., 2021
299	ABO14	MZ383446	MZ330001	n/a	Aboto	Kwara	Nigeria	Sola-Ojo et al., 2021
300	ADE15	MZ383450	MZ330003	n/a	Aderan	Kwara	Nigeria	Sola-Ojo et al., 2021
301	ILE16	MZ383473	N/A	n/a	Ilesha	Kwara	Nigeria	Sola-Ojo et al., 2021
302	MOU17	MZ383487	MZ330041	n/a	Mokwa	Niger	Nigeria	Sola-Ojo et al., 2021
303	ABO18	MZ383447	N/A	n/a	Aboto	Kwara	Nigeria	Sola-Ojo et al., 2021
304	BON20	MZ383466	MZ330024	n/a	Bani	Kwara	Nigeria	Sola-Ojo et al., 2021
305	ILE23	MZ383474	MZ330031	n/a	Ilesha	Kwara	Nigeria	Sola-Ojo et al., 2021
306	ADE24	MZ383451	MZ330004	n/a	Aderan	Kwara	Nigeria	Sola-Ojo et al., 2021
307	BON25	MZ383467	MZ330025	n/a	Bani	Kwara	Nigeria	Sola-Ojo et al., 2021
308	PAT26	N/A	N/A	n/a	Patigi	Kwara	Nigeria	Sola-Ojo et al., 2021
309	IDO27	MZ383468	MZ330027	n/a	Idofian	Kwara	Nigeria	Sola-Ojo et al., 2021
310	MOU30	MZ383488	N/A	n/a	Mokwa	Niger	Nigeria	Sola-Ojo et al., 2021
311	ILE31	MZ383475	N/A	n/a	Ilesha baruba	Kwara	Nigeria	Sola-Ojo et al., 2021
312	ILE32	MZ383476	MZ330032	n/a	Ilesha baruba	Kwara	Nigeria	Sola-Ojo et al., 2021
313	IDO33	MZ383469	MZ330028	n/a	Idofian	Kwara	Nigeria	Sola-Ojo et al., 2021
314	OKE34	MZ383503	MZ330056	n/a	Okuta	Kwara	Nigeria	Sola-Ojo et al., 2021
315	PAT35	MZ383504	MZ330057	n/a	Patigi	Kwara	Nigeria	Sola-Ojo et al., 2021
316	PAT36	MZ383505	MZ330058	n/a	Patigi	Kwara	Nigeria	Sola-Ojo et al., 2021
317	PAT37	MZ383506	MZ330059	n/a	Patigi	Kwara	Nigeria	Sola-Ojo et al., 2021
318	PAT38	MZ383507	MZ330060	n/a	Patigi	Kwara	Nigeria	Sola-Ojo et al., 2021
319	PAT39	MZ383508	MZ330061	n/a	Patigi	Kwara	Nigeria	Sola-Ojo et al., 2021
320	PAT40	MZ383509	N/A	n/a	Patigi	Kwara	Nigeria	Sola-Ojo et al., 2021
321	PAT41	MZ383510	MZ330062	n/a	Patigi	Kwara	Nigeria	Sola-Ojo et al., 2021
322	PAT42	MZ383511	MZ330063	n/a	Patigi	Kwara	Nigeria	Sola-Ojo et al., 2021
323	PAT43	MZ383512	N/A	n/a	Patigi	Kwara	Nigeria	Sola-Ojo et al., 2021
324	PAT44	MZ383513	N/A	n/a	Patigi	Kwara	Nigeria	Sola-Ojo et al., 2021
325	PAT45	MZ383514	MZ330064	n/a	Patigi	Kwara	Nigeria	Sola-Ojo et al., 2021
326	NIG46	MZ383494	MZ330048	n/a	Minna	Niger	Nigeria	Sola-Ojo et al., 2021
327	NIG47	N/A	MZ330049	n/a	Minna	Niger	Nigeria	Sola-Ojo et al., 2021
328	NIG48	MZ383495	MZ330050	n/a	Minna	Niger	Nigeria	Sola-Ojo et al., 2021
329	NIG49	MZ383496	MZ330051	n/a	Minna	Niger	Nigeria	Sola-Ojo et al., 2021
330	NIG50	MZ383497	MZ330052	n/a	Minna	Niger	Nigeria	Sola-Ojo et al., 2021
331	NIG51	MZ383498	MZ330053	n/a	Minna	Niger	Nigeria	Sola-Ojo et al., 2021
332	NIG52	MZ383499	MZ330054	n/a	Minna	Niger	Nigeria	Sola-Ojo et al., 2021
333	NIG53	MZ383500	N/A	n/a	Minna	Niger	Nigeria	Sola-Ojo et al., 2021
334	NIG54	MZ383501	N/A	n/a	Minna	Niger	Nigeria	Sola-Ojo et al., 2021
335	KEY261	MZ383478	MZ330034	n/a	Oke oyi	Kwara	Nigeria	Sola-Ojo et al., 2021
336	KEY162	MZ383477	MZ330033	n/a	Oke oyi	Kwara	Nigeria	Sola-Ojo et al., 2021
337	KEY563	MZ383481	MZ330037	n/a	Oke oyi	Kwara	Nigeria	Sola-Ojo et al., 2021
338	KEY764	MZ383483	MZ330039	n/a	Oke oyi	Kwara	Nigeria	Sola-Ojo et al., 2021
339	KEY465	MZ383480	MZ330036	n/a	Oke oyi	Kwara	Nigeria	Sola-Ojo et al., 2021
340	KEY366	MZ383479	MZ330035	n/a	Oke oyi	Kwara	Nigeria	Sola-Ojo et al., 2021
341	KEY667	MZ383482	MZ330038	n/a	Oke oyi	Kwara	Nigeria	Sola-Ojo et al., 2021
342	PAT168	MZ383515	MZ330065	n/a	Patigi	Kwara	Nigeria	Sola-Ojo et al., 2021
343	PAT269	MZ383516	MZ330066	n/a	Patigi	Kwara	Nigeria	Sola-Ojo et al., 2021
344	PAT370	MZ383518	MZ330067	n/a	Patigi	Kwara	Nigeria	Sola-Ojo et al., 2021
345	PAT471	MZ383519	MZ330068	n/a	Patigi	Kwara	Nigeria	Sola-Ojo et al., 2021
346	PAT572	MZ383520	MZ330069	n/a	Patigi	Kwara	Nigeria	Sola-Ojo et al., 2021
347	PAT673	MZ383521	N/A	n/a	Patigi	Kwara	Nigeria	Sola-Ojo et al., 2021
348	PAT774	MZ383522	MZ330070	n/a	Patigi	Kwara	Nigeria	Sola-Ojo et al., 2021
349	PAT875	MZ383523	MZ330071	n/a	Patigi	Kwara	Nigeria	Sola-Ojo et al., 2021
350	NBS176	N/A	MZ330042	n/a	New bussa	Niger	Nigeria	Sola-Ojo et al., 2021
351	NBS277	N/A	MZ330043	n/a	New bussa	Niger	Nigeria	Sola-Ojo et al., 2021
352	NBS378	MZ383491	MZ330044	n/a	New bussa	Niger	Nigeria	Sola-Ojo et al., 2021
353	NBS479	MZ383492	MZ330045	n/a	New bussa	Niger	Nigeria	Sola-Ojo et al., 2021
354	NBS580	MZ383493	MZ330046	n/a	New bussa	Niger	Nigeria	Sola-Ojo et al., 2021
355	NBS681	N/A	MZ330047	n/a	New bussa	Niger	Nigeria	Sola-Ojo et al., 2021
356	NBS182	N/A	N/A	n/a	New bussa	Niger	Nigeria	Sola-Ojo et al., 2021
357	BDS183	N/A	MZ330013	n/a	Bode saadu	Kwara	Nigeria	Sola-Ojo et al., 2021
358	BDS284	N/A	MZ330014	n/a	Bode saadu	Kwara	Nigeria	Sola-Ojo et al., 2021
359	BDS385	N/A	MZ330015	n/a	Bode saadu	Kwara	Nigeria	Sola-Ojo et al., 2021
360	BDS486	MZ383459	MZ330016	n/a	Bode saadu	Kwara	Nigeria	Sola-Ojo et al., 2021
361	BDS587	MZ383460	MZ330017	n/a	Bode saadu	Kwara	Nigeria	Sola-Ojo et al., 2021
362	BDS688	N/A	MZ330018	n/a	Bode saadu	Kwara	Nigeria	Sola-Ojo et al., 2021
363	BDS789	N/A	MZ330019	n/a	Bode saadu	Kwara	Nigeria	Sola-Ojo et al., 2021
364	BDS890	N/A	MZ330020	n/a	Bode saadu	Kwara	Nigeria	Sola-Ojo et al., 2021
365	BDS991	MZ383461	MZ330021	n/a	Bode saadu	Kwara	Nigeria	Sola-Ojo et al., 2021
366	BART192	N/A	MZ330005	n/a	Kosubosu	Kwara	Nigeria	Sola-Ojo et al., 2021
367	BART293	MZ383452	MZ330006	n/a	Kosubosu	Kwara	Nigeria	Sola-Ojo et al., 2021
368	BART394	MZ383453	MZ330007	n/a	Kosubosu	Kwara	Nigeria	Sola-Ojo et al., 2021
369	BART495	MZ383454	MZ330008	n/a	Kosubosu	Kwara	Nigeria	Sola-Ojo et al., 2021
370	BART596	MZ383455	MZ330009	n/a	Kosubosu	Kwara	Nigeria	Sola-Ojo et al., 2021
371	BART697	MZ383456	MZ330010	n/a	Kosubosu	Kwara	Nigeria	Sola-Ojo et al., 2021
372	BART798	N/A	MZ330011	n/a	Kosubosu	Kwara	Nigeria	Sola-Ojo et al., 2021
373	BART899	MZ383457	MZ330012	n/a	Kosubosu	Kwara	Nigeria	Sola-Ojo et al., 2021
374	BAT293	MZ383452	N/A	n/a	Kosubosu	Kwara	Nigeria	Sola-Ojo et al., 2021
375	BDS380	MZ383458	N/A	n/a	Bode saadu	Kwara	Nigeria	Sola-Ojo et al., 2021
376	PAT270	MZ383517	N/A	n/a	Patigi	Kwara	Nigeria	Sola-Ojo et al., 2021
377	PATI26	MZ383524	N/A	n/a	Patigi	Kwara	Nigeria	Sola-Ojo et al., 2021
378	BONI25	MZ383467	N/A	n/a	Bani	Kwara	Nigeria	Sola-Ojo et al., 2021
379	MUSCO01	KX985578	KX985658	n/a	n/a	n/a	India	Kameshpandian et al., 2018
380	MUSCO02	KX985579	KX985659	n/a	n/a	n/a	India	Kameshpandian et al., 2018
381	MUSCO03	KX985580	KX985660	n/a	n/a	n/a	India	Kameshpandian et al., 2018
382	MUSCO04	KX985581	KX985661	n/a	n/a	n/a	India	Kameshpandian et al., 2018
383	MUSCO05	KX985582	KX985662	n/a	n/a	n/a	India	Kameshpandian et al., 2018
384	MUSCO06	KX985583	KX985663	n/a	n/a	n/a	India	Kameshpandian et al., 2018
385	MUSCO07	KX985584	KX985664	n/a	n/a	n/a	India	Kameshpandian et al., 2018
386	MUSCO08	KX985585	KX985665	n/a	n/a	n/a	India	Kameshpandian et al., 2018
387	MUSCO09	KX985586	KX985666	n/a	n/a	n/a	India	Kameshpandian et al., 2018
388	MUSCO10	KX985587	KX985667	n/a	n/a	n/a	India	Kameshpandian et al., 2018
389	MUSCO11	KX985588	KX985668	n/a	n/a	n/a	India	Kameshpandian et al., 2018
390	MUSCO12	KX985589	KX985669	n/a	n/a	n/a	India	Kameshpandian et al., 2018
391	MUSCO13	KX985590	KX985670	n/a	n/a	n/a	India	Kameshpandian et al., 2018
392	MUSCO14	KX985591	KX985671	n/a	n/a	n/a	India	Kameshpandian et al., 2018
393	MUSCO15	KX985592	KX985672	n/a	n/a	n/a	India	Kameshpandian et al., 2018
394	MUSCO16	KX985593	KX985673	n/a	n/a	n/a	India	Kameshpandian et al., 2018
395	MUSCO17	KX985594	KX985674	n/a	n/a	n/a	India	Kameshpandian et al., 2018
396	MUSCO18	KX985595	KX985675	n/a	n/a	n/a	India	Kameshpandian et al., 2018
397	MUSCO19	KX985596	KX985676	n/a	n/a	n/a	India	Kameshpandian et al., 2018
398	MUSCO20	KX985597	KX985677	n/a	n/a	n/a	India	Kameshpandian et al., 2018
399	MUSCO21	KX985598	KX985678	n/a	n/a	n/a	India	Kameshpandian et al., 2018
400	MUSCO22	KX985599	KX985679	n/a	n/a	n/a	India	Kameshpandian et al., 2018
401	MUSCO23	KX985600	KX985680	n/a	n/a	n/a	India	Kameshpandian et al., 2018
402	MUSCO24	KX985601	KX985681	n/a	n/a	n/a	India	Kameshpandian et al., 2018
403	MUSCO25	KX985602	KX985682	n/a	n/a	n/a	India	Kameshpandian et al., 2018
404	MUSCO26	KX985603	KX985683	n/a	n/a	n/a	India	Kameshpandian et al., 2018
405	MUSCO27	KX985604	KX985684	n/a	n/a	n/a	India	Kameshpandian et al., 2018
406	MUSCO28	KX985605	KX985685	n/a	n/a	n/a	India	Kameshpandian et al., 2018
407	MUSCO29	KX985606	KX985686	n/a	n/a	n/a	India	Kameshpandian et al., 2018
408	MUSCO30	KX985607	KX985687	n/a	n/a	n/a	India	Kameshpandian et al., 2018
409	MUSCO31	KX985608	KX985688	n/a	n/a	n/a	India	Kameshpandian et al., 2018
410	MUSCO32	KX985609	KX985689	n/a	n/a	n/a	India	Kameshpandian et al., 2018
411	MUSCO33	KX985610	KX985690	n/a	n/a	n/a	India	Kameshpandian et al., 2018
412	MUSCO34	KX985611	KX985691	n/a	n/a	n/a	India	Kameshpandian et al., 2018
413	MUSCO35	KX985612	KX985692	n/a	n/a	n/a	India	Kameshpandian et al., 2018
414	MUSCO36	KX985613	KX985693	n/a	n/a	n/a	India	Kameshpandian et al., 2018
415	MUSCO37	KX985614	KX985694	n/a	n/a	n/a	India	Kameshpandian et al., 2018
416	MUSCO38	KX985615	KX985695	n/a	n/a	n/a	India	Kameshpandian et al., 2018
417	MUSCO39	KX985616	KX985696	n/a	n/a	n/a	India	Kameshpandian et al., 2018
418	MUSCO40	KX985617	KX985697	n/a	n/a	n/a	India	Kameshpandian et al., 2018
419	MUSCO41	KX985618	KX985698	n/a	n/a	n/a	India	Kameshpandian et al., 2018
420	MUSCO42	KX985619	KX985699	n/a	n/a	n/a	India	Kameshpandian et al., 2018
421	MUSCO43	KX985620	KX985700	n/a	n/a	n/a	India	Kameshpandian et al., 2018
422	MUSCO44	KX985621	KX985701	n/a	n/a	n/a	India	Kameshpandian et al., 2018
423	MUSCO45	KX985622	KX985702	n/a	n/a	n/a	India	Kameshpandian et al., 2018
424	MUSCO46	KX985623	KX985703	n/a	n/a	n/a	India	Kameshpandian et al., 2018
425	MUSCO47	KX985624	KX985704	n/a	n/a	n/a	India	Kameshpandian et al., 2018
426	MUSCO48	KX985625	KX985705	n/a	n/a	n/a	India	Kameshpandian et al., 2018
427	MUSCO49	KX985626	KX985706	n/a	n/a	n/a	India	Kameshpandian et al., 2018
428	MUSCO50	KX985627	KX985707	n/a	n/a	n/a	India	Kameshpandian et al., 2018
429	MUSCO51	KX985628	KX985708	n/a	n/a	n/a	India	Kameshpandian et al., 2018
430	MUSCO52	KX985629	KX985709	n/a	n/a	n/a	India	Kameshpandian et al., 2018
431	MUSCO53	KX985630	KX985710	n/a	n/a	n/a	India	Kameshpandian et al., 2018
432	MUSCO54	KX985631	KX985711	n/a	n/a	n/a	India	Kameshpandian et al., 2018
433	MUSCO55	KX985632	KX985712	n/a	n/a	n/a	India	Kameshpandian et al., 2018
434	MUSCO56	KX985633	KX985713	n/a	n/a	n/a	India	Kameshpandian et al., 2018
435	MUSCO57	KX985634	KX985714	n/a	n/a	n/a	India	Kameshpandian et al., 2018
436	MUSCO58	KX985635	KX985715	n/a	n/a	n/a	India	Kameshpandian et al., 2018
437	MUSCO59	KX985636	KX985716	n/a	n/a	n/a	India	Kameshpandian et al., 2018
438	MUSCO60	KX985637	KX985717	n/a	n/a	n/a	India	Kameshpandian et al., 2018
439	MUSCO61	KX985638	KX985718	n/a	n/a	n/a	India	Kameshpandian et al., 2018
440	MUSCO62	KX985639	KX985719	n/a	n/a	n/a	India	Kameshpandian et al., 2018
441	MUSCO63	KX985640	KX985720	n/a	n/a	n/a	India	Kameshpandian et al., 2018
442	MUSCO64	KX985641	KX985721	n/a	n/a	n/a	India	Kameshpandian et al., 2018
443	MUSCO65	KX985642	KX985722	n/a	n/a	n/a	India	Kameshpandian et al., 2018
444	MUSCO66	KX985643	KX985723	n/a	n/a	n/a	India	Kameshpandian et al., 2018
445	MUSCO67	KX985644	KX985724	n/a	n/a	n/a	India	Kameshpandian et al., 2018
446	MUSCO68	KX985645	KX985725	n/a	n/a	n/a	India	Kameshpandian et al., 2018
447	MUSCO69	KX985646	KX985726	n/a	n/a	n/a	India	Kameshpandian et al., 2018
448	MUSCO70	KX985647	KX985727	n/a	n/a	n/a	India	Kameshpandian et al., 2018
449	MUSCO71	KX985648	KX985728	n/a	n/a	n/a	India	Kameshpandian et al., 2018
450	MUSCO72	KX985649	KX985729	n/a	n/a	n/a	India	Kameshpandian et al., 2018
451	MUSCO73	KX985650	KX985730	n/a	n/a	n/a	India	Kameshpandian et al., 2018
452	MUSCO74	KX985651	KX985731	n/a	n/a	n/a	India	Kameshpandian et al., 2018
453	MUSCO75	KX985652	KX985732	n/a	n/a	n/a	India	Kameshpandian et al., 2018
454	MUSCO76	KX985653	KX985733	n/a	n/a	n/a	India	Kameshpandian et al., 2018
455	MUSCO77	KX985654	KX985734	n/a	n/a	n/a	India	Kameshpandian et al., 2018
456	MUSCO78	KX985655	KX985735	n/a	n/a	n/a	India	Kameshpandian et al., 2018
457	MUSCO79	KX985656	N/A	n/a	n/a	n/a	India	Kameshpandian et al., 2018
458	MUSCO80	KX985657	N/A	n/a	n/a	n/a	India	Kameshpandian et al., 2018
459	N/A	N/A	L08385	n/a	n/a	n/a	USA	Kornegay et al., 1993
460	N/A	N/A	AF059098	n/a	n/a	n/a	USA	Johnson and Sorenson, 1998
461	N/A	N/A	EU755254	n/a	n/a	n/a	China	Tu et al., 2014

## Sheet: Table S2-42H-397-NIG+IND+OG
Table S2: Cytochrome b haplotype distribution among Muscovy ducks from Nigeria and India
s/n	Haplotype	Haplotypes name	Frequency	Oyo	Kano	Ekiti	Sokoto	Kwara	Niger	Bayelsa	Taraba	India	Outgroup
1	H1	OUTGROUP	1	0	0	0	0	0	0	0	0	0	1
2	H2	ABO14	1	0	0	0	0	1	0	0	0	0	0
3	H3	ADE11	1	0	0	0	0	1	0	0	0	0	0
4	H4	ADE15	273	64	46	43	13	42	11	49	5	0	0
5	H5	BAA100	5	0	2	0	0	0	0	3	0	0	0
6	H6	BAA101	1	0	0	0	0	0	0	1	0	0	0
7	H7	BAA103	1	0	0	0	0	0	0	1	0	0	0
8	H8	BAA106	51	1	4	0	1	3	0	4	0	38	0
9	H9	BAA107	1	0	0	0	0	0	0	1	0	0	0
10	H10	BAB111	1	0	0	0	0	0	0	1	0	0	0
11	H11	BAB119	1	0	0	0	0	0	0	1	0	0	0
12	H12	BAB134	1	0	0	0	0	0	0	1	0	0	0
13	H13	BON10	1	0	0	0	0	1	0	0	0	0	0
14	H14	BON20	1	0	0	0	0	1	0	0	0	0	0
15	H15	BON25	1	0	0	0	0	1	0	0	0	0	0
16	H16	IDO2	1	0	0	0	0	1	0	0	0	0	0
17	H17	IDO27	1	0	0	0	0	1	0	0	0	0	0
18	H18	IDO33	1	0	0	0	0	1	0	0	0	0	0
19	H19	ILE32	1	0	0	0	0	1	0	0	0	0	0
20	H20	KAA142	1	0	1	0	0	0	0	0	0	0	0
21	H21	KAA146	1	0	1	0	0	0	0	0	0	0	0
22	H22	KAA169	1	0	1	0	0	0	0	0	0	0	0
23	H23	KAA170	1	0	1	0	0	0	0	0	0	0	0
24	H24	KAB192	1	0	1	0	0	0	0	0	0	0	0
25	H25	MUSCO01	6	0	0	0	0	0	0	0	0	6	0
26	H26	MUSCO02	2	0	0	0	0	0	0	0	0	2	0
27	H27	MUSCO03	1	0	0	0	0	0	0	0	0	1	0
28	H28	MUSCO05	3	0	0	0	0	0	0	0	0	3	0
29	H29	MUSCO09	4	0	0	0	0	0	0	0	0	4	0
30	H30	MUSCO19	1	0	0	0	0	0	0	0	0	1	0
31	H31	MUSCO20	1	0	0	0	0	0	0	0	0	1	0
32	H32	MUSCO21	18	0	0	0	0	0	0	0	0	18	0
33	H33	MUSCO69	1	0	0	0	0	0	0	0	0	1	0
34	H34	MUSCO75	3	0	0	0	0	0	0	0	0	3	0
35	H35	NIG50	1	0	0	0	0	0	1	0	0	0	0
36	H36	NIG51	1	0	0	0	0	0	1	0	0	0	0
37	H37	NIG52	1	0	0	0	0	0	1	0	0	0	0
38	H38	OKE34	1	0	0	0	0	1	0	0	0	0	0
39	H39	OKE8	1	0	0	0	0	1	0	0	0	0	0
40	H40	OYA10	1	1	0	0	0	0	0	0	0	0	0
41	H41	PAT35	1	0	0	0	0	1	0	0	0	0	0
42	H42	SOK266	1	0	0	0	1	0	0	0	0	0	0

## Sheet: TABLE S3-31H-NIGERIA-319-Cytoc
Table S3: Cytochrome b haplotype distribution among Muscovy ducks from Nigeria
s/n	Haplotype	Haplotype name	Frequency	Oyo	Kano	Ekiti	Sokoto	Kwara	Niger	Bayelsa	Taraba
1	H1	ABO14	1	0	0	0	0	1	0	0	0
2	H2	ADE11	1	0	0	0	0	1	0	0	0
3	H3	ADE15	273	64	46	43	13	42	11	49	5
4	H4	BAA100	5	0	2	0	0	0	0	3	0
5	H5	BAA101	1	0	0	0	0	0	0	1	0
6	H6	BAA103	1	0	0	0	0	0	0	1	0
7	H7	BAA106	13	1	4	0	1	3	0	4	0
8	H8	BAA107	1	0	0	0	0	0	0	1	0
9	H9	BAB111	1	0	0	0	0	0	0	1	0
10	H10	BAB119	1	0	0	0	0	0	0	1	0
11	H11	BAB134	1	0	0	0	0	0	0	1	0
12	H12	BON10	1	0	0	0	0	1	0	0	0
13	H13	BON20	1	0	0	0	0	1	0	0	0
14	H14	BON25	1	0	0	0	0	1	0	0	0
15	H20	IDO2	1	0	0	0	0	1	0	0	0
16	H21	IDO27	1	0	0	0	0	1	0	0	0
17	H22	IDO33	1	0	0	0	0	1	0	0	0
18	H23	ILE32	1	0	0	0	0	1	0	0	0
19	H24	KAA142	1	0	1	0	0	0	0	0	0
20	H25	KAA146	1	0	1	0	0	0	0	0	0
21	H26	KAA169	1	0	1	0	0	0	0	0	0
22	H27	KAA170	1	0	1	0	0	0	0	0	0
23	H28	KAB192	1	0	1	0	0	0	0	0	0
24	H29	NIG50	1	0	0	0	0	0	1	0	0
25	H30	NIG51	1	0	0	0	0	0	1	0	0
26	H31	NIG52	1	0	0	0	0	0	1	0	0
27	H32	OKE34	1	0	0	0	0	1	0	0	0
28	H33	OKE8	1	0	0	0	0	1	0	0	0
29	H34	OYA10	1	1	0	0	0	0	0	0	0
30	H35	PAT35	1	0	0	0	0	1	0	0	0
31	H36	SOK266	1	0	0	0	1	0	0	0	0

## Sheet: Table S4-95H-396-NIG+IND-CYP2U
Table S4: CYP2U1 haplotype distribution among Muscovy duck populations from Nigeria and India
s/n	Haplotype	Haplotypes name	Frequency	Bayelsa	Ekiti	Kano	Oyo	Sokoto	Taraba	Niger	Kwara	India
1	H1	ABO14	135	24	17	27	25	3	2	7	30	0
2	H2	ABO18	1	0	0	0	0	0	0	0	1	0
3	H3	ADE11	2	0	0	0	0	0	0	0	2	0
4	H4	ADE24	10	1	0	3	1	0	0	0	5	0
5	H5	BAA100	1	1	0	0	0	0	0	0	0	0
6	H6	BAA101	1	1	0	0	0	0	0	0	0	0
7	H7	BAA109	2	2	0	0	0	0	0	0	0	0
8	H8	BAA74	1	1	0	0	0	0	0	0	0	0
9	H9	BAA75	6	3	0	0	3	0	0	0	0	0
10	H10	BAA78	25	6	7	7	3	0	0	0	2	0
11	H11	BAA79	1	1	0	0	0	0	0	0	0	0
12	H12	BAA81	1	1	0	0	0	0	0	0	0	0
13	H13	BAA91	1	1	0	0	0	0	0	0	0	0
14	H14	BAA92	13	5	3	1	1	0	0	0	3	0
15	H15	BAA93	5	2	0	0	1	1	0	0	1	0
16	H16	BAA94	19	4	2	3	5	1	0	0	3	1
17	H17	BAA95	1	1	0	0	0	0	0	0	0	0
18	H18	BAA99	5	1	0	1	2	0	0	1	0	0
19	H19	BAB110	1	1	0	0	0	0	0	0	0	0
20	H20	BAB111	1	1	0	0	0	0	0	0	0	0
21	H21	BAB114	1	1	0	0	0	0	0	0	0	0
22	H22	BAB115	1	1	0	0	0	0	0	0	0	0
23	H23	BAB116	1	1	0	0	0	0	0	0	0	0
24	H24	BAB118	1	1	0	0	0	0	0	0	0	0
25	H25	BAB121	1	1	0	0	0	0	0	0	0	0
26	H26	BAB124	1	1	0	0	0	0	0	0	0	0
27	H27	BAB125	1	1	0	0	0	0	0	0	0	0
28	H28	BAB129	1	1	0	0	0	0	0	0	0	0
29	H29	BAB135	1	1	0	0	0	0	0	0	0	0
30	H30	BAB137	1	1	0	0	0	0	0	0	0	0
31	H31	BART495	1	0	0	0	0	0	0	0	1	0
32	H32	BART697	2	0	0	0	0	0	0	0	2	0
33	H33	BART899	1	0	0	0	0	0	0	0	1	0
34	H34	BDS380	1	0	0	0	0	0	0	0	1	0
35	H35	BDS486	1	0	0	0	0	0	0	0	1	0
36	H36	BDS587	1	0	0	0	0	0	0	0	1	0
37	H37	BON20	1	0	0	0	0	0	0	0	1	0
38	H38	EKA206	1	0	1	0	0	0	0	0	0	0
39	H39	EKA216	2	0	1	0	1	0	0	0	0	0
40	H40	EKA227	1	0	1	0	0	0	0	0	0	0
41	H41	EKA229	1	0	1	0	0	0	0	0	0	0
42	H42	EKA231	1	0	1	0	0	0	0	0	0	0
43	H43	EKB250	1	0	1	0	0	0	0	0	0	0
44	H44	EKB252	1	0	1	0	0	0	0	0	0	0
45	H45	ILE23	1	0	0	0	0	0	0	0	1	0
46	H46	KAA141	2	0	0	1	1	0	0	0	0	0
47	H47	KAA142	1	0	0	1	0	0	0	0	0	0
48	H48	KAA148	1	0	0	1	0	0	0	0	0	0
49	H49	KAA149	13	0	0	2	1	1	0	0	0	9
50	H50	KAA150	1	0	0	1	0	0	0	0	0	0
51	H51	KAA171	1	0	0	1	0	0	0	0	0	0
52	H52	KAB179	1	0	0	1	0	0	0	0	0	0
53	H53	KAB183	1	0	0	1	0	0	0	0	0	0
54	H54	KAB186	1	0	0	1	0	0	0	0	0	0
55	H55	KEY261	1	0	0	0	0	0	0	0	1	0
56	H56	KEY667	1	0	0	0	0	0	0	0	1	0
57	H57	KEY764	1	0	0	0	0	0	0	0	1	0
58	H58	MOU30	1	0	0	0	0	0	0	1	0	0
59	H59	NBS176	1	0	0	0	0	0	0	1	0	0
60	H60	NBS277	2	0	0	0	0	0	0	2	0	0
61	H61	NBS580	1	0	0	0	0	0	0	1	0	0
62	H62	NIG46	1	0	0	0	0	0	0	1	0	0
63	H63	NIG50	2	0	0	0	0	0	0	1	1	0
64	H64	OYA1	1	0	0	0	1	0	0	0	0	0
65	H65	OYA19	1	0	0	0	1	0	0	0	0	0
66	H66	OYA2	3	0	0	0	3	0	0	0	0	0
67	H67	OYA20	1	0	0	0	1	0	0	0	0	0
68	H68	OYA22	1	0	0	0	1	0	0	0	0	0
69	H69	OYA23	1	0	0	0	1	0	0	0	0	0
70	H70	OYA26	1	0	0	0	1	0	0	0	0	0
71	H71	OYA28	1	0	0	0	1	0	0	0	0	0
72	H72	OYA30	3	0	0	0	3	0	0	0	0	0
73	H73	OYA33	1	0	0	0	1	0	0	0	0	0
74	H74	OYA34	1	0	0	0	1	0	0	0	0	0
75	H75	OYA36	1	0	0	0	1	0	0	0	0	0
76	H76	OYA37	3	0	0	0	3	0	0	0	0	0
77	H77	OYA4	1	0	0	0	1	0	0	0	0	0
78	H78	OYA7	1	0	0	0	1	0	0	0	0	0
79	H79	OYB40	1	0	0	0	1	0	0	0	0	0
80	H80	OYB49	1	0	0	0	1	0	0	0	0	0
81	H81	OYB54	1	0	0	0	1	0	0	0	0	0
82	H82	MUSCO02	50	0	0	0	1	0	0	0	0	49
83	H83	OYB57	1	0	0	0	1	0	0	0	0	0
84	H84	OYB70	1	0	0	0	1	0	0	0	0	0
85	H85	PAT37	1	0	0	0	0	0	0	0	1	0
86	H86	PAT45	1	0	0	0	0	0	0	0	1	0
87	H87	PAT673	1	0	0	0	0	0	0	0	1	0
88	H88	PAT774	1	0	0	0	0	0	0	0	1	0
89	H89	SERT282	6	0	0	0	0	0	1	0	0	5
90	H90	SOK269	12	0	0	0	0	1	0	0	0	11
91	H91	SOK277	1	0	0	0	0	1	0	0	0	0
92	H92	MUSCO18	2	0	0	0	0	0	0	0	0	2
93	H93	MUSCO025	1	0	0	0	0	0	0	0	0	1
94	H94	MUSCO63	1	0	0	0	0	0	0	0	0	1
95	H95	MUSCO67	1	0	0	0	0	0	0	0	0	1

## Sheet: TABLE S5-91H-NIGERIA-316-CYP2U
Table S5: CYP2U1 haplotype distribution among Muscovy duck population from Nigeria
s/n	Haplotype	Haplotype name	Frequency	Bayelsa	Ekiti	Kano	Oyo	Sokoto	Taraba	Niger	Kwara
1	H1	ABO14	135	24	17	27	25	3	2	7	30
2	H2	ABO18	1	0	0	0	0	0	0	0	1
3	H3	ADE11	2	0	0	0	0	0	0	0	2
4	H4	ADE24	10	1	0	3	1	0	0	0	5
5	H5	BAA100	1	1	0	0	0	0	0	0	0
6	H6	BAA101	1	1	0	0	0	0	0	0	0
7	H7	BAA109	2	2	0	0	0	0	0	0	0
8	H8	BAA74	1	1	0	0	0	0	0	0	0
9	H9	BAA75	6	3	0	0	3	0	0	0	0
10	H10	BAA78	25	6	7	7	3	0	0	0	2
11	H11	BAA79	1	1	0	0	0	0	0	0	0
12	H12	BAA81	1	1	0	0	0	0	0	0	0
13	H13	BAA91	1	1	0	0	0	0	0	0	0
14	H14	BAA92	13	5	3	1	1	0	0	0	3
15	H15	BAA93	5	2	0	0	1	1	0	0	1
16	H16	BAA94	18	4	2	3	5	1	0	0	3
17	H17	BAA95	1	1	0	0	0	0	0	0	0
18	H18	BAA99	5	1	0	1	2	0	0	1	0
19	H19	BAB110	1	1	0	0	0	0	0	0	0
20	H20	BAB111	1	1	0	0	0	0	0	0	0
21	H21	BAB114	1	1	0	0	0	0	0	0	0
22	H22	BAB115	1	1	0	0	0	0	0	0	0
23	H23	BAB116	1	1	0	0	0	0	0	0	0
24	H24	BAB118	1	1	0	0	0	0	0	0	0
25	H25	BAB121	1	1	0	0	0	0	0	0	0
26	H26	BAB124	1	1	0	0	0	0	0	0	0
27	H27	BAB125	1	1	0	0	0	0	0	0	0
28	H28	BAB129	1	1	0	0	0	0	0	0	0
29	H29	BAB135	1	1	0	0	0	0	0	0	0
30	H30	BAB137	1	1	0	0	0	0	0	0	0
31	H31	BART495	1	0	0	0	0	0	0	0	1
32	H32	BART697	2	0	0	0	0	0	0	0	2
33	H33	BART899	1	0	0	0	0	0	0	0	1
34	H34	BDS380	1	0	0	0	0	0	0	0	1
35	H35	BDS486	1	0	0	0	0	0	0	0	1
36	H36	BDS587	1	0	0	0	0	0	0	0	1
37	H37	BON20	1	0	0	0	0	0	0	0	1
38	H38	EKA206	1	0	1	0	0	0	0	0	0
39	H39	EKA216	2	0	1	0	1	0	0	0	0
40	H40	EKA227	1	0	1	0	0	0	0	0	0
41	H41	EKA229	1	0	1	0	0	0	0	0	0
42	H42	EKA231	1	0	1	0	0	0	0	0	0
43	H43	EKB250	1	0	1	0	0	0	0	0	0
44	H44	EKB252	1	0	1	0	0	0	0	0	0
45	H45	ILE23	1	0	0	0	0	0	0	0	1
46	H46	KAA141	2	0	0	1	1	0	0	0	0
47	H47	KAA142	1	0	0	1	0	0	0	0	0
48	H48	KAA148	1	0	0	1	0	0	0	0	0
49	H49	KAA149	4	0	0	2	1	1	0	0	0
50	H50	KAA150	1	0	0	1	0	0	0	0	0
51	H51	KAA171	1	0	0	1	0	0	0	0	0
52	H52	KAB179	1	0	0	1	0	0	0	0	0
53	H53	KAB183	1	0	0	1	0	0	0	0	0
54	H54	KAB186	1	0	0	1	0	0	0	0	0
55	H55	KEY261	1	0	0	0	0	0	0	0	1
56	H56	KEY667	1	0	0	0	0	0	0	0	1
57	H57	KEY764	1	0	0	0	0	0	0	0	1
58	H58	MOU30	1	0	0	0	0	0	0	1	0
59	H59	NBS176	1	0	0	0	0	0	0	1	0
60	H60	NBS277	2	0	0	0	0	0	0	2	0
61	H61	NBS580	1	0	0	0	0	0	0	1	0
62	H62	NIG46	1	0	0	0	0	0	0	1	0
63	H63	NIG50	2	0	0	0	0	0	0	1	1
64	H64	OYA1	1	0	0	0	1	0	0	0	0
65	H65	OYA19	1	0	0	0	1	0	0	0	0
66	H66	OYA2	3	0	0	0	3	0	0	0	0
67	H67	OYA20	1	0	0	0	1	0	0	0	0
68	H68	OYA22	1	0	0	0	1	0	0	0	0
69	H69	OYA23	1	0	0	0	1	0	0	0	0
70	H70	OYA26	1	0	0	0	1	0	0	0	0
71	H71	OYA28	1	0	0	0	1	0	0	0	0
72	H72	OYA30	3	0	0	0	3	0	0	0	0
73	H73	OYA33	1	0	0	0	1	0	0	0	0
74	H74	OYA34	1	0	0	0	1	0	0	0	0
75	H75	OYA36	1	0	0	0	1	0	0	0	0
76	H76	OYA37	3	0	0	0	3	0	0	0	0
77	H77	OYA4	1	0	0	0	1	0	0	0	0
78	H78	OYA7	1	0	0	0	1	0	0	0	0
79	H79	OYB40	1	0	0	0	1	0	0	0	0
80	H80	OYB49	1	0	0	0	1	0	0	0	0
81	H81	OYB54	1	0	0	0	1	0	0	0	0
82	H82	OYB56	1	0	0	0	1	0	0	0	0
83	H83	OYB57	1	0	0	0	1	0	0	0	0
84	H84	OYB70	1	0	0	0	1	0	0	0	0
85	H85	PAT37	1	0	0	0	0	0	0	0	1
86	H86	PAT45	1	0	0	0	0	0	0	0	1
87	H87	PAT673	1	0	0	0	0	0	0	0	1
88	H88	PAT774	1	0	0	0	0	0	0	0	1
89	H89	SERT282	1	0	0	0	0	0	1	0	0
90	H90	SOK269	1	0	0	0	0	1	0	0	0
91	H91	SOK277	1	0	0	0	0	1	0	0	0
