# Supplementary material for: Genetic diversity and population structure of muscovy duck ( Cairina moschata ) from Nigeria
Source: PeerJ journal article supplement (doi:10.7717/peerj.13236), 2022-04-15
Supplement: Table_S6_R.pdf [file Table_S6_R.pdf]

**Table S6** Geographical structure assessed using analysis of molecular variance (AMOVA). AMOVA subdivides genetic diversity into hierarchical components and estimates the parameter  $F_{ST}$ , which assesses the relative divergence between populations. The statistical significance of variance components and  $F_{ST}$  indices were assessed by bootstrapping using 1000 replicates. Analyses were carried out sequentially for all samples based on cytochrome b

| Hierarchical clusters                                                                                        | Hierarchy | Variance components               | % of variation | F        | <i>P</i> -value |
|--------------------------------------------------------------------------------------------------------------|-----------|-----------------------------------|----------------|----------|-----------------|
| 1. Nigerian populations (overall) <sup>1</sup>                                                               | 1         | Within populations                | 97.45          | -        | -               |
|                                                                                                              |           | Among populations                 | 2.55           | 0.02550  | 0.01075         |
| 2. Among regions (North <sup>2</sup> vs. Central <sup>2</sup> vs. West <sup>2</sup> vs. South <sup>2</sup> ) | 4         | Within populations                | 97.19          | 0.02807  | 0.01173         |
|                                                                                                              |           | Within populations within regions | 0.48           | 0.00492  | 0.05963         |
|                                                                                                              |           | Among regions                     | 2.33           | 0.02326  | 0.21310         |
| 3. North central (Kwara + Niger) vs. remaining populations                                                   | 2         | Within populations                | 94.48          | 0.05522  | 0.01662         |
|                                                                                                              |           | Within populations within regions | 0.27           | 0.00281  | 0.19648         |
|                                                                                                              |           | Among regions                     | 5.26           | 0.05256  | 0.07331         |
| 4. North <sup>2</sup> vs. South <sup>2</sup>                                                                 | 2         | Within populations                | 98.16          | 0.01841  | 0.02346         |
|                                                                                                              |           | Within populations within regions | 3.14           | 0.03099  | 0.35582         |
|                                                                                                              |           | Among regions                     | -1.30          | -0.01299 | 0.98534         |
| 5. Ekiti vs. remaining populations <sup>3</sup>                                                              | 2         | Within populations                | 99.01          | 0.00986  | 0.02053         |
|                                                                                                              |           | Within populations within groups  | 3.20           | 0.03129  | 0.02542         |
|                                                                                                              |           | Among groups                      | -2.21          | -0.02213 | 0.87488         |
| 6. Oyo vs. remaining populations <sup>3</sup>                                                                | 2         | Within populations                | 98.54          | 0.01461  | 0.01271         |
|                                                                                                              |           | Within populations within groups  | 3.31           | 0.03245  | 0.00587         |
|                                                                                                              |           | Among groups                      | -1.84          | -0.01844 | 0.52199         |
| 7. Bayelsa vs. remaining populations <sup>3</sup>                                                            | 2         | Within populations                | 98.06          | 0.01942  | 0.01564         |
|                                                                                                              |           | Within populations within groups  | 2.94           | 0.02913  | 0.03812         |
|                                                                                                              |           | Among groups                      | -1.00          | -0.01000 | 0.40665         |
| 8. Sokoto vs. remaining populations <sup>3</sup>                                                             | 2         | Within populations                | 99.12          | 0.00884  | 0.02346         |
|                                                                                                              |           | Within populations within groups  | 2.80           | 0.02747  | 0.00196         |
|                                                                                                              |           | Among groups                      | -1.92          | -0.01915 | 0.60020         |
| 9. Kano vs. remaining populations <sup>3</sup>                                                               | 2         | Within populations                | 98.76          | 0.01236  | 0.01369         |
|                                                                                                              |           | Within populations within groups  | 3.32           | 0.03250  | 0.01760         |
|                                                                                                              |           | Among groups                      | -2.08          | -0.02082 | 0.75171         |
| 10. Niger vs. remaining populations <sup>3</sup>                                                             | 2         | Within populations                | 97.13          | 0.02868  | 0.01466         |
|                                                                                                              |           | Within populations within groups  | 2.50           | 0.02514  | 0.00098         |
|                                                                                                              |           | Among groups                      | 0.36           | 0.00363  | 0.26295         |

|                                                   |   |                                  |        |          |         |
|---------------------------------------------------|---|----------------------------------|--------|----------|---------|
| 11. Kwara vs. remaining populations <sup>3</sup>  | 2 | Within populations               | 92.03  | 0.07972  | 0.01662 |
|                                                   |   | Within populations within groups | -0.69  | -0.00750 | 0.01760 |
|                                                   |   | Among groups                     | 8.66   | 0.08657  | 0.11535 |
| 12. Taraba vs. remaining populations <sup>3</sup> | 2 | Within populations               | 108.78 | -0.08780 | 0.01955 |
|                                                   |   | Within populations within groups | 3.29   | 0.02939  | 0.00587 |
|                                                   |   | Among groups                     | -12.07 | -0.12074 | 1.00000 |

---

<sup>1</sup>Overall is Nigerian domesticated guinea fowl populations which were as follows (number of samples in parentheses): Taraba (n=5), Sokoto (n=15), Ekiti (n=53), Kano (n=57), Bayelsa (n=62), Oyo (n=66) and North Central (n=72).

<sup>2</sup>North (Sokoto, Kano, Taraba); Central (Kwara, Taraba); West (Oyo, Ekiti); South (Bayelsa)

<sup>3</sup>remaining populations include all the populations listed above except the mentioned population.
