# Supplementary material for: Genetic diversity and population structure of muscovy duck ( Cairina moschata ) from Nigeria
Source: PeerJ journal article supplement (doi:10.7717/peerj.13236), 2022-04-15
Supplement: Table_S7.pdf [file Table_S7.pdf]

**Table S7** Geographical structure assessed using analysis of molecular variance (AMOVA). AMOVA subdivides genetic diversity into hierarchical components and estimates the parameter  $F_{ST}$ , which assesses the relative divergence between populations. The statistical significance of variance components and  $F_{ST}$  indices were assessed by bootstrapping using 1000 replicates. Analyses were carried out sequentially for all samples based on CYP2U1

| Hierarchical clusters                                                                                        | Hierarchy | Variance components               | % of variation | F        | P-value |
|--------------------------------------------------------------------------------------------------------------|-----------|-----------------------------------|----------------|----------|---------|
| 1. Nigerian populations (overall) <sup>1</sup>                                                               | 1         | Within populations                | 97.68          | -        | -       |
|                                                                                                              |           | Among populations                 | 2.32           | 0.02318  | 0.00978 |
| 2. Among regions (North <sup>2</sup> vs. Central <sup>2</sup> vs. West <sup>2</sup> vs. South <sup>2</sup> ) | 4         | Within populations                | 97.45          | 0.025530 | 0.01466 |
|                                                                                                              |           | Within populations within regions | 1.01           | .01028   | 0.25122 |
|                                                                                                              |           | Among regions                     | 1.54           | 0.01541  | 0.15152 |
| 3. Among regions (North <sup>2</sup> vs. South <sup>2</sup> )                                                | 2         | Within populations                | 98.11          | 0.01895  | 0.00684 |
|                                                                                                              |           | Within populations within regions | 3.57           | 0.03513  | 0.00196 |
|                                                                                                              |           | Among regions                     | -1.68          | -0.01677 | 0.96481 |
| 4. North central (Kwara + Niger) vs. remaining populations                                                   | 2         | Within populations                | 96.40          | 0.035980 | 0.00978 |
|                                                                                                              |           | Within populations within groups  | 1.29           | .01317   | 0.12414 |
|                                                                                                              |           | Among groups                      | 2.31           | 0.02311  | 0.18768 |
| 5. Ekiti vs. remaining populations <sup>3</sup>                                                              | 2         | Within populations                | 96.70          | 0.03304  | 0.01075 |
|                                                                                                              |           | Within populations within groups  | 1.93           | 0.01960  | 0.00978 |
|                                                                                                              |           | Among groups                      | 1.37           | 0.01371  | 0.22190 |
| 6. Oyo vs. remaining populations <sup>3</sup>                                                                | 2         | Within populations                | 97.69          | 0.023050 | 0.01369 |
|                                                                                                              |           | Within populations within groups  | 2.33           | .02326   | 0.03421 |
|                                                                                                              |           | Among groups                      | -0.02          | -0.00021 | 0.57967 |
| 7. Bayelsa vs. remaining populations <sup>3</sup>                                                            | 2         | Within populations                | 97.12          | 0.028840 | 0.01075 |
|                                                                                                              |           | Within populations within groups  | 1.96           | .01974   | 0.02346 |
|                                                                                                              |           | Among groups                      | 0.93           | 0.00929  | 0.33627 |
| 8. Sokoto vs. remaining populations <sup>3</sup>                                                             | 2         | Within populations                | 98.59          | 0.01412  | 0.01271 |
|                                                                                                              |           | Within populations within groups  | 2.82           | 0.02780  | 0.00684 |
|                                                                                                              |           | Among groups                      | -1.41          | -0.01408 | 0.83480 |
| 9. Kano vs. remaining populations <sup>3</sup>                                                               | 2         | Within populations                | 98.77          | 0.01233  | 0.00782 |
|                                                                                                              |           | Within populations within groups  | 2.84           | 0.02794  | 0.00880 |
|                                                                                                              |           | Among groups                      | -1.61          | -0.01606 | 0.87195 |
| 10. Niger vs. remaining populations <sup>3</sup>                                                             | 2         | Within populations                | 97.53          | 0.024680 | 0.01760 |
|                                                                                                              |           | Within populations within groups  | 2.14           | .02152   | 0.00782 |
|                                                                                                              |           | Among groups                      | 0.32           | 0.00324  | 0.44184 |

|                                                   |   |                                  |        |          |         |
|---------------------------------------------------|---|----------------------------------|--------|----------|---------|
| 11. Kwara vs. remaining populations <sup>3</sup>  | 2 | Within populations               | 96.91  | 0.030940 | 0.01271 |
|                                                   |   | Within populations within groups | 2.14   | .02165   | 0.01369 |
|                                                   |   | Among groups                     | 0.95   | 0.00949  | 0.43304 |
| 12. Taraba vs. remaining populations <sup>3</sup> | 2 | Within populations               | 107.54 | -0.07537 | 0.00587 |
|                                                   |   | Within populations within groups | 3.45   | 0.03110  | 0.00196 |
|                                                   |   | Among groups                     | -10.99 | -0.10988 | 1.00000 |

---

<sup>1</sup>Overall is Nigerian Muscovy duck populations which were as follows (number of samples in parentheses): Taraba (n=3), Sokoto (n=8), Ekiti (n=36), Kano (n=52), Bayelsa (n=67), Oyo (n=71) and Kwara (n=64), Niger (n=15).

<sup>2</sup>North (Sokoto, Kano, Taraba); Central (Kwara, Taraba); West (Oyo, Ekiti); South (Bayelsa)

<sup>3</sup>remaining populations include all the populations listed above except the mentioned population.
